# Supplementary material for: Inactivation of mediator complex protein 22 in podocytes results in intracellular vacuole formation, podocyte loss and premature death
Source: PubMed Central journal article supplement (PMC7676236; doi:10.1038/s41598-020-76870-0), 2020-11-18

**Inactivation of mediator complex protein 22 in podocytes results in intracellular vacuole formation, podocyte loss and premature death**

Patricia Q. Rodriguez, PhD<sup>1</sup>, David Unnersjö-Jess PhD<sup>2</sup>, Sonia S. Zambrano, PhD<sup>1</sup>, Jing Guo J<sup>3,4</sup>, Katja Möller-Hackbarth, PhD<sup>1</sup>, Hans G. Blom, PhD<sup>2</sup>, Timo Jahnukainen, MD<sup>5</sup>, Lwaki Ebarasi, PhD<sup>1</sup>, Jaakko Patrakka, MD, PhD<sup>1</sup>

**SUPPLEMENTARY FIGURES**

## Supplementary Figure 1

| Gene   | RNA expression in Kidney (GTEx) | Signal in Glomeruli | Signal in Tubuli |
|--------|---------------------------------|---------------------|------------------|
| Med1   | 2,7                             | Medium              | Low              |
| Med4   | 10,2                            | Medium              | Low              |
| Med6   | 4,2                             | Medium              | Medium           |
| Med7   | 3,9                             | n/a                 | n/a              |
| Med8   | 13,3                            | negative            | medium           |
| Med9   | 8,8                             | negative            | low              |
| Med10  | 13,9                            | n/a                 | n/a              |
| Med11  | 11,2                            | negative            | negative         |
| Med12  | 6,6                             | High                | High             |
| Med12L | 0                               | negative            | negative         |
| Med13  | 3,9                             | n/a                 | n/a              |
| Med13L | 5,2                             | low                 | Medium           |
| Med14  | 4,5                             | n/a                 | n/a              |
| Med15  | 19,8                            | Medium              | Low              |
| Med16  | 14,4                            | low                 | high             |
| Med17  | 2,8                             | n/a                 | n/a              |
| Med18  | 3,9                             | negative            | Low              |
| Med19  | 6,9                             | low                 | Medium           |
| Med20  | 4,5                             | Medium              | negative         |
| Med21  | 7,2                             | High                | low              |
| Med22  | 5,9                             | high                | low              |
| Med23  | 4,1                             | n/a                 | n/a              |
| Med24  | n/a                             | n/a                 | n/a              |
| Med25  | 17,2                            | n/a                 | n/a              |
| Med26  | 1,8                             | negative            | negative         |
| Med27  | 6,3                             | Medium              | Medium           |
| Med28  | 5,1                             | negative            | negative         |
| Med29  | 13,3                            | n/a                 | n/a              |
| Med30  | 5,1                             | n/a                 | n/a              |
| Med31  | 5,8                             | low                 | Medium           |
| cdk8   | 1,9                             | n/a                 | n/a              |
| cdk19  | 3,3                             | Medium              | Medium           |
| CCNC   | 23,5                            | Not detected        | Medium           |

Med21

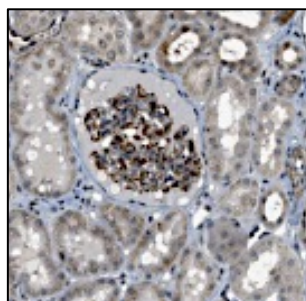

Med22

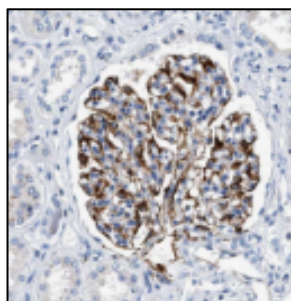

Source: [www.proteinatlas.org](http://www.proteinatlas.org)

## Supplementary Figure 2

A.

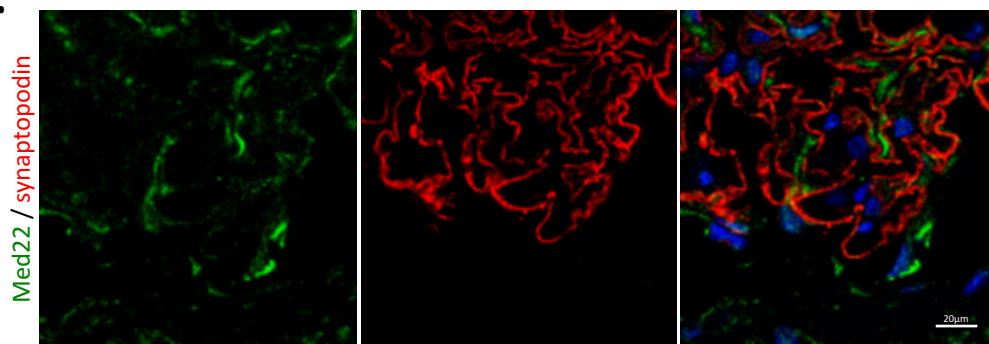

B.

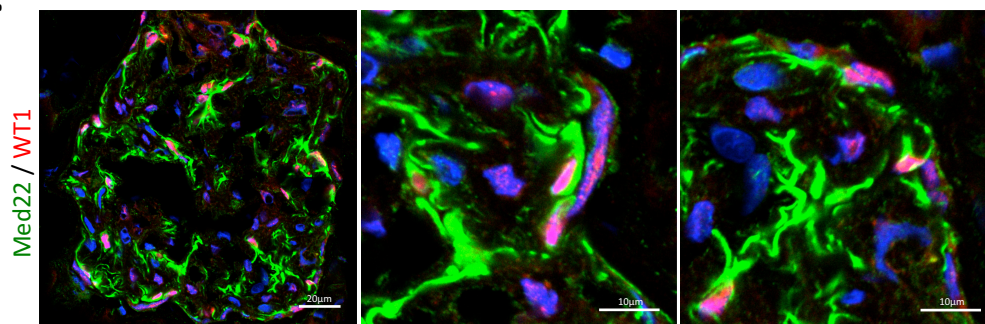

C.

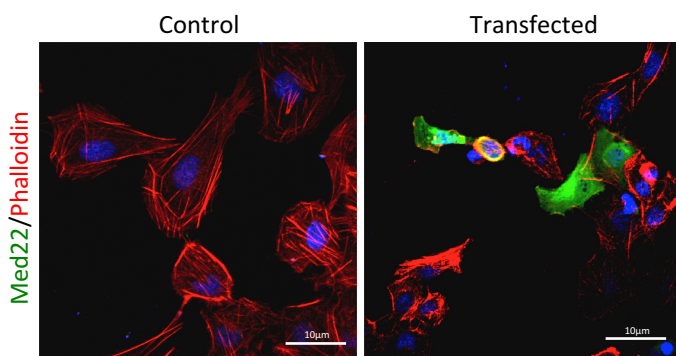

D.

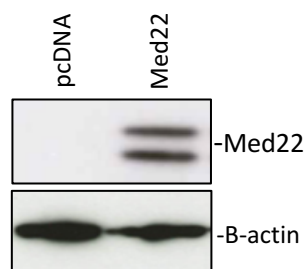

# Supplementary Figure 3

A.

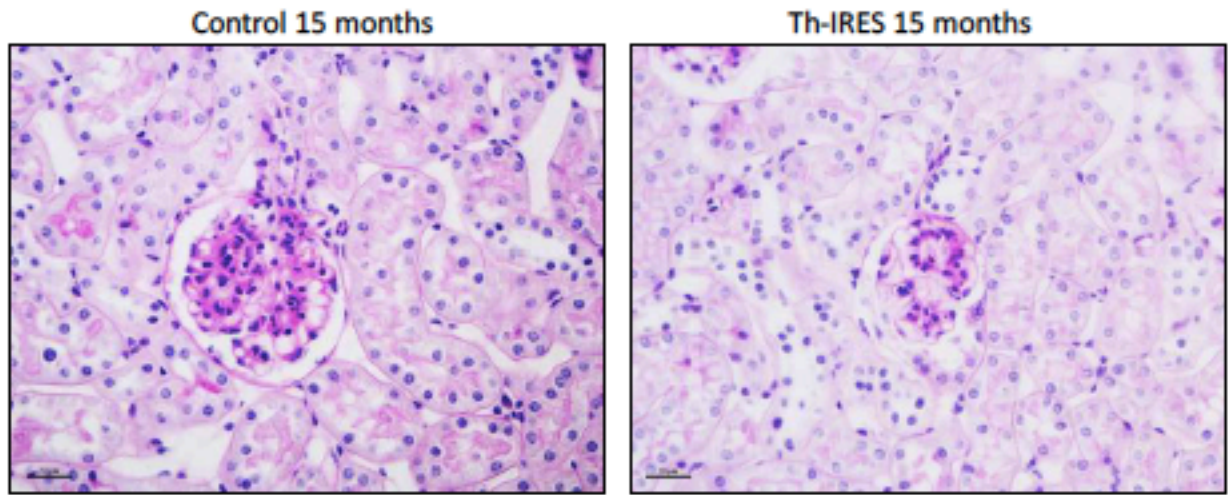

B.

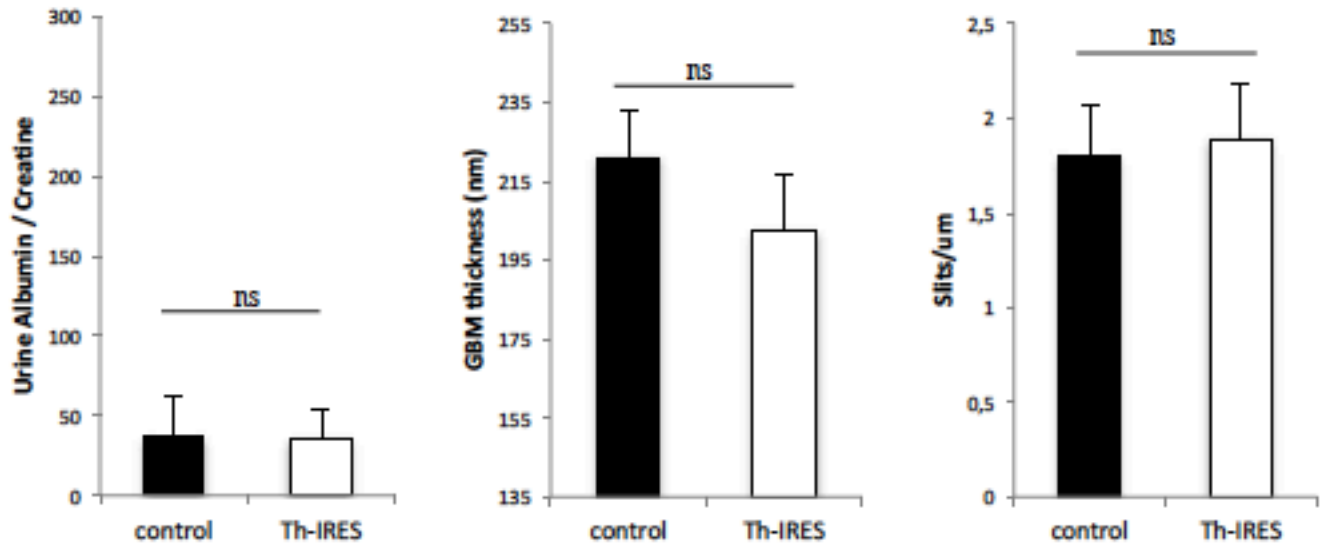

# Supplementary Figure 4

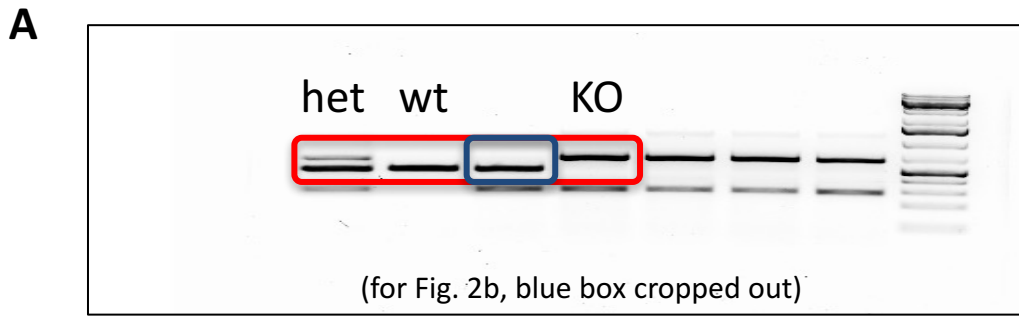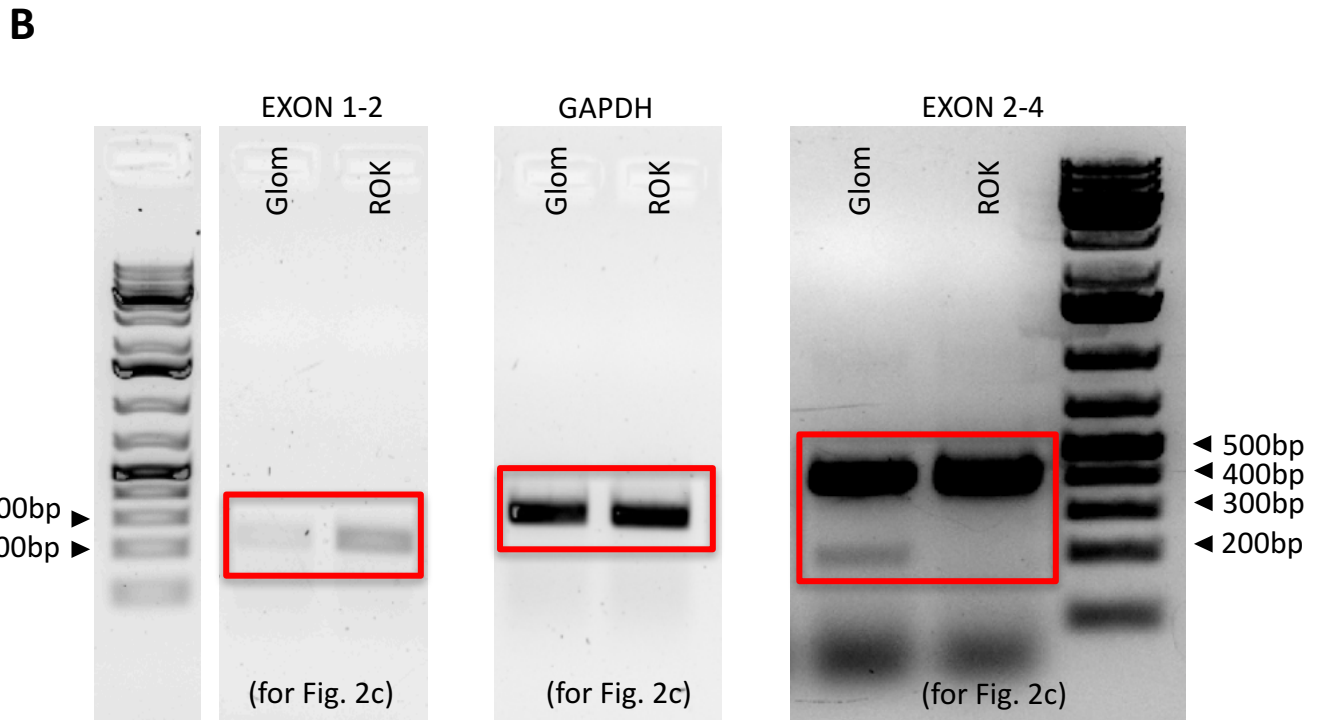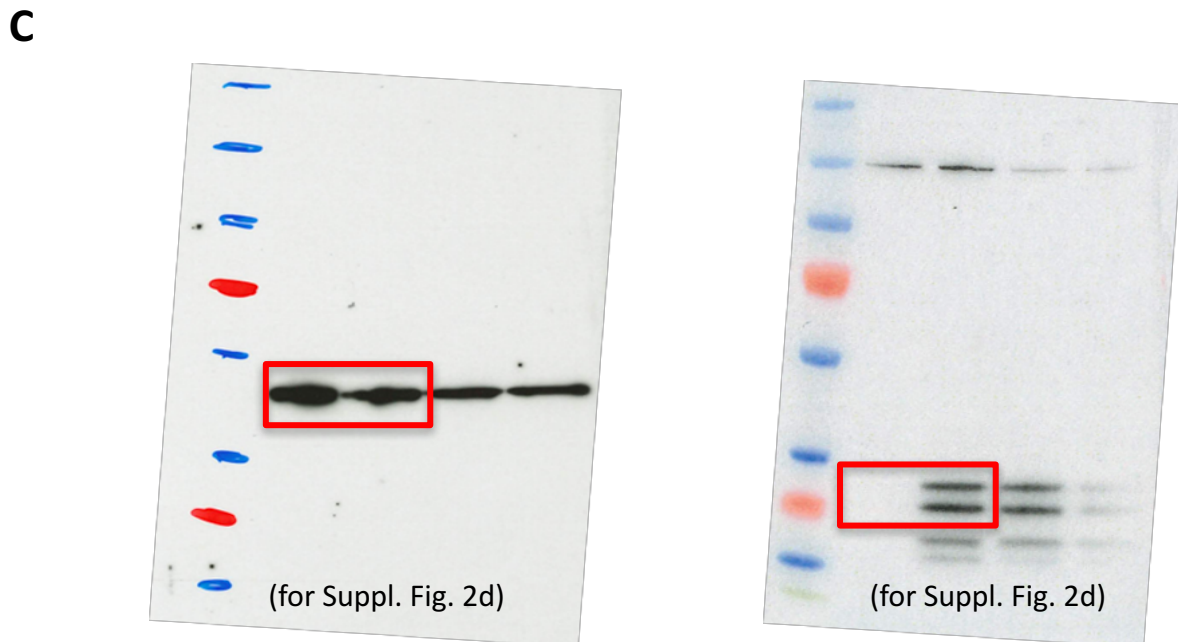

Supplement: 41598_2020_76870_MOESM1_ESM.pdf [file 41598_2020_76870_MOESM1_ESM.pdf]
