# Supplementary material for: Inactivation of mediator complex protein 22 in podocytes results in intracellular vacuole formation, podocyte loss and premature death
Source: PubMed Central journal article supplement (PMC7676236; doi:10.1038/s41598-020-76870-0), 2020-11-18
Supplement: 41598_2020_76870_MOESM2_ESM.pdf [file 41598_2020_76870_MOESM2_ESM.pdf]

**SUPPLEMENTAL TABLE 1.** RNAseq analysis of pod-Med22 glomeruli.

|                      | <b>CJP2133</b> | <b>IKJP2130</b> | <b>Control_mean</b> | <b>KO_mean</b> | <b>baseMean</b> | <b>log2FoldChange</b> | <b>stat</b> | <b>pvalue</b> | <b>padj</b> |
|----------------------|----------------|-----------------|---------------------|----------------|-----------------|-----------------------|-------------|---------------|-------------|
| <b>Mgat5b</b>        | 1144,52        | 292,33          | 1629,16             | 314,23         | 1136,06         | -1,18                 | -7,033      | 2,02E-12      | 5,25E-09    |
| <b>Vtcn1</b>         | 510,50         | 160,64          | 478,63              | 138,14         | 350,95          | -1,11                 | -6,897      | 5,30E-12      | 1,02E-08    |
| <b>2610204G07Rik</b> | 106,03         | 17,75           | 67,51               | 10,93          | 46,29           | -0,91                 | -5,522      | 3,35E-08      | 2,87E-05    |
| <b>Krt7</b>          | 3646,72        | 1497,14         | 3219,11             | 1593,89        | 2609,65         | -0,91                 | -8,883      | 6,50E-19      | 5,01E-15    |
| <b>Pvrl4</b>         | 696,33         | 230,69          | 611,79              | 225,73         | 467,01          | -0,90                 | -5,598      | 2,17E-08      | 1,97E-05    |
| <b>RP24-289J12.1</b> | 3326,43        | 1798,81         | 3561,96             | 1876,61        | 2929,95         | -0,88                 | -12,45      | 1,32E-35      | 2,03E-31    |
| <b>Fgfbp1</b>        | 3036,74        | 1893,14         | 3510,24             | 1711,21        | 2835,60         | -0,85                 | -6,634      | 3,27E-11      | 5,60E-08    |
| <b>Slc26a7</b>       | 1465,90        | 963,85          | 1599,94             | 674,51         | 1252,90         | -0,83                 | -5,274      | 1,33E-07      | 9,33E-05    |
| <b>Gm15866</b>       | 81,99          | 20,55           | 58,09               | 19,14          | 43,48           | -0,81                 | -4,848      | 1,25E-06      | 0,000550658 |
| <b>Sptbn5</b>        | 2623,54        | 2174,26         | 4767,32             | 1761,89        | 3640,28         | -0,76                 | -4,528      | 5,96E-06      | 0,001956212 |
| <b>Gm4804</b>        | 87,45          | 45,76           | 91,72               | 28,60          | 68,05           | -0,75                 | -4,457      | 8,31E-06      | 0,002481548 |
| <b>PLA2G4B</b>       | 153,04         | 75,65           | 160,84              | 59,53          | 122,85          | -0,74                 | -4,432      | 9,33E-06      | 0,002664392 |
| <b>Xlr3b</b>         | 289,68         | 53,24           | 182,35              | 69,85          | 140,16          | -0,74                 | -4,388      | 1,14E-05      | 0,002986058 |
| <b>Opcml</b>         | 167,25         | 37,36           | 205,49              | 31,34          | 140,19          | -0,73                 | -4,596      | 4,31E-06      | 0,001511158 |
| <b>Gm826</b>         | 94,01          | 45,76           | 86,12               | 35,41          | 67,11           | -0,71                 | -4,292      | 1,77E-05      | 0,004410347 |
| <b>BC029214</b>      | 4277,46        | 2909,29         | 4751,94             | 2662,46        | 3968,39         | -0,71                 | -5,982      | 2,20E-09      | 2,61E-06    |
| <b>Axdnd1</b>        | 321,38         | 144,76          | 288,33              | 147,81         | 235,64          | -0,70                 | -4,735      | 2,19E-06      | 0,000865971 |
| <b>Myl7</b>          | 572,81         | 255,91          | 651,17              | 284,05         | 513,50          | -0,67                 | -4,011      | 6,05E-05      | 0,012146546 |
| <b>H2-Q6</b>         | 73981,53       | 35383,16        | 66252,81            | 29334,38       | 52408,40        | -0,67                 | -4,021      | 5,80E-05      | 0,011921347 |
| <b>Arhgap24</b>      | 19929,04       | 12485,21        | 18397,98            | 11192,63       | 15695,97        | -0,66                 | -6,971      | 3,14E-12      | 6,93E-09    |

|                      |           |          |           |          |           |       |        |          |             |
|----------------------|-----------|----------|-----------|----------|-----------|-------|--------|----------|-------------|
| <b>2810433D01Rik</b> | 538,92    | 391,33   | 684,38    | 377,64   | 569,36    | -0,65 | -4,599 | 4,25E-06 | 0,001511158 |
| <b>Top1mt</b>        | 4767,18   | 3291,28  | 5680,10   | 3386,30  | 4819,93   | -0,65 | -5,95  | 2,69E-09 | 2,96E-06    |
| <b>Gja1</b>          | 336,69    | 173,72   | 342,44    | 183,42   | 282,81    | -0,64 | -4,225 | 2,39E-05 | 0,005594011 |
| <b>Med22</b>         | 2184,09   | 1500,88  | 2138,60   | 1350,84  | 1843,19   | -0,61 | -6,427 | 1,30E-10 | 2,00E-07    |
| <b>1700029J07Rik</b> | 185,83    | 116,75   | 186,28    | 99,39    | 153,70    | -0,59 | -3,68  | 0,00023  | 0,032707235 |
| <b>Magi2</b>         | 10124,66  | 6750,68  | 10173,25  | 6530,96  | 8807,39   | -0,59 | -6,407 | 1,48E-10 | 2,08E-07    |
| <b>6430573F11Rik</b> | 188,02    | 161,58   | 218,09    | 112,99   | 178,68    | -0,58 | -3,548 | 0,00039  | 0,047473589 |
| <b>Rab3b</b>         | 3988,87   | 2597,35  | 4811,46   | 2819,00  | 4064,29   | -0,57 | -3,913 | 9,12E-05 | 0,016632146 |
| <b>Dkk2</b>          | 11872,59  | 11979,00 | 17300,96  | 9843,60  | 14504,45  | -0,57 | -3,729 | 0,00019  | 0,029129745 |
| <b>Clic3</b>         | 8389,85   | 6082,90  | 9732,81   | 5799,91  | 8257,97   | -0,56 | -3,864 | 0,00011  | 0,018868801 |
| <b>Kcnf1</b>         | 2484,71   | 1484,07  | 2096,99   | 1279,93  | 1790,60   | -0,55 | -3,913 | 9,10E-05 | 0,016632146 |
| <b>Igfbp3</b>        | 1307,40   | 774,25   | 1182,43   | 747,21   | 1019,22   | -0,53 | -3,944 | 8,00E-05 | 0,01505039  |
| <b>Nphs2</b>         | 117077,48 | 86610,06 | 114369,29 | 76240,43 | 100070,97 | -0,53 | -5,311 | 1,09E-07 | 8,12E-05    |
| <b>Timp3</b>         | 53689,57  | 34662,14 | 47356,54  | 31875,22 | 41551,05  | -0,51 | -4,887 | 1,02E-06 | 0,000478024 |
| <b>Trib2</b>         | 9167,07   | 7217,66  | 9317,39   | 6329,32  | 8196,86   | -0,51 | -5,308 | 1,11E-07 | 8,12E-05    |
| <b>Tdrd5</b>         | 7733,97   | 5649,54  | 8136,89   | 5425,55  | 7120,14   | -0,51 | -4,395 | 1,11E-05 | 0,002986058 |
| <b>Asb15</b>         | 2087,90   | 1261,78  | 1873,87   | 1228,02  | 1631,67   | -0,50 | -3,912 | 9,17E-05 | 0,016632146 |
| <b>Ifngr1</b>        | 6279,00   | 4696,90  | 5910,26   | 4124,21  | 5240,50   | -0,47 | -4,53  | 5,89E-06 | 0,001956212 |
| <b>Trabd2b</b>       | 4162,68   | 2116,36  | 4142,90   | 2792,57  | 3636,53   | -0,46 | -3,549 | 0,00039  | 0,047473589 |
| <b>Synpo</b>         | 102856,83 | 75427,73 | 108257,02 | 75736,77 | 96061,93  | -0,44 | -3,676 | 0,00024  | 0,032813171 |
| <b>Metrn1</b>        | 3649,99   | 2400,28  | 3706,78   | 2652,40  | 3311,39   | -0,44 | -4,456 | 8,37E-06 | 0,002481548 |
| <b>Tmtc1</b>         | 6955,65   | 5442,20  | 7261,91   | 5336,89  | 6540,03   | -0,41 | -4,47  | 7,82E-06 | 0,002412371 |
| <b>S1pr4</b>         | 424,14    | 302,60   | 409,19    | 300,05   | 368,26    | -0,40 | -3,754 | 0,00017  | 0,027370026 |
| <b>Upp1</b>          | 907,31    | 658,44   | 798,24    | 607,29   | 726,63    | -0,36 | -3,631 | 0,00028  | 0,037789176 |

|                 |               |               |           |           |           |       |        |          |             |
|-----------------|---------------|---------------|-----------|-----------|-----------|-------|--------|----------|-------------|
| <b>Myo1d</b>    | 25754,38      | 20196,94      | 24824,05  | 19260,39  | 22737,68  | -0,35 | -4,958 | 7,13E-07 | 0,000366783 |
| <b>Podxl</b>    | 380359,17     | 288338,46     | 361271,58 | 292242,37 | 335385,62 | -0,29 | -3,591 | 0,00033  | 0,042044813 |
| <b>Sqstm1</b>   | 15982,80      | 12955,93      | 15545,35  | 12756,27  | 14499,44  | -0,28 | -4,738 | 2,16E-06 | 0,000865971 |
| <b>Itm2b</b>    | 82852,36      | 70618,76      | 85496,89  | 73001,01  | 80810,93  | -0,22 | -3,745 | 0,00018  | 0,028088274 |
| <b>Emc1</b>     | 2054,01       | 2334,91       | 2019,83   | 2356,74   | 2146,17   | 0,22  | 3,889  | 0,0001   | 0,017816211 |
| <b>Arf3</b>     | 8960,47       | 9727,22       | 8770,91   | 10356,82  | 9365,63   | 0,23  | 3,719  | 0,0002   | 0,029129745 |
| <b>Os9</b>      | 6791,68       | 7425,00       | 6618,02   | 7850,62   | 7080,25   | 0,24  | 3,598  | 0,00032  | 0,041280117 |
| <b>Rcn2</b>     | 2589,65       | 3196,95       | 2595,25   | 3078,88   | 2776,61   | 0,24  | 4,135  | 3,55E-05 | 0,007943893 |
| <b>Pam</b>      | 7111,97       | 7935,88       | 6840,61   | 8128,79   | 7323,68   | 0,24  | 3,992  | 6,54E-05 | 0,012896038 |
| <b>Wls</b>      | 10104,99      | 12173,27      | 10208,52  | 12233,20  | 10967,78  | 0,26  | 5,188  | 2,13E-07 | 0,000131383 |
| <b>Qsox2</b>    | 1758,86       | 2012,69       | 1739,71   | 2111,78   | 1879,24   | 0,27  | 3,721  | 0,0002   | 0,029129745 |
| <b>Snrpa1</b>   | <u>637,30</u> | <u>777,06</u> | 645,23    | 787,06    | 698,41    | 0,27  | 3,652  | 0,00026  | 0,035239729 |
| <b>Itfg1</b>    | 3842,39       | 4564,27       | 3731,92   | 4543,34   | 4036,20   | 0,28  | 4,97   | 6,70E-07 | 0,000360066 |
| <b>Fam168a</b>  | 3484,93       | 4443,79       | 3555,77   | 4355,81   | 3855,78   | 0,28  | 4,762  | 1,92E-06 | 0,000800701 |
| <b>Tmem184c</b> | 1238,53       | 1625,09       | 1287,43   | 1626,54   | 1414,59   | 0,32  | 4,027  | 5,65E-05 | 0,011845865 |
| <b>Cxadr</b>    | 2101,02       | 2339,58       | 2096,90   | 2656,28   | 2306,67   | 0,32  | 3,72   | 0,0002   | 0,029129745 |
| <b>Hexim1</b>   | 4572,60       | 4896,76       | 4382,09   | 5622,08   | 4847,09   | 0,33  | 3,605  | 0,00031  | 0,040866891 |
| <b>Sap18</b>    | 3561,45       | 3893,69       | 3120,31   | 3997,20   | 3449,14   | 0,33  | 3,719  | 0,0002   | 0,029129745 |
| <b>Pde3b</b>    | 906,21        | 1126,36       | 944,44    | 1217,69   | 1046,91   | 0,34  | 3,565  | 0,00036  | 0,045541808 |
| <b>Tmem242</b>  | 808,92        | 1083,40       | 821,92    | 1056,51   | 909,89    | 0,34  | 3,973  | 7,09E-05 | 0,013491218 |
| <b>Ptprd</b>    | 4722,36       | 6107,18       | 5054,54   | 6657,17   | 5655,52   | 0,36  | 3,713  | 0,0002   | 0,029496292 |
| <b>Nt5dc3</b>   | 650,42        | 769,58        | 609,22    | 801,16    | 681,20    | 0,36  | 3,865  | 0,00011  | 0,018868801 |
| <b>R3hdm4</b>   | 2222,35       | 2568,40       | 2186,72   | 2886,94   | 2449,31   | 0,36  | 3,77   | 0,00016  | 0,025986785 |
| <b>Cd99l2</b>   | 2716,45       | 3040,05       | 2565,49   | 3483,90   | 2909,89   | 0,40  | 3,99   | 6,61E-05 | 0,012896038 |

|                      |          |          |          |          |          |      |       |          |             |
|----------------------|----------|----------|----------|----------|----------|------|-------|----------|-------------|
| <b>Mgat4a</b>        | 4421,75  | 5757,88  | 4371,41  | 5958,83  | 4966,69  | 0,40 | 4,01  | 6,06E-05 | 0,012146546 |
| <b>Gm16515</b>       | 2519,69  | 3420,17  | 2839,07  | 3883,36  | 3230,68  | 0,40 | 3,862 | 0,00011  | 0,018886446 |
| <b>Axl</b>           | 14067,62 | 15912,85 | 12994,11 | 17513,93 | 14689,04 | 0,41 | 5,136 | 2,81E-07 | 0,000166622 |
| <b>Sgcb</b>          | 681,03   | 921,82   | 658,90   | 909,47   | 752,86   | 0,41 | 3,629 | 0,00028  | 0,037789176 |
| <b>Pcsk5</b>         | 2896,82  | 3940,39  | 2762,60  | 3773,61  | 3141,73  | 0,42 | 4,968 | 6,77E-07 | 0,000360066 |
| <b>Pigs</b>          | 1276,79  | 1654,98  | 1346,12  | 1885,01  | 1548,21  | 0,42 | 3,72  | 0,0002   | 0,029129745 |
| <b>Cd82</b>          | 5002,21  | 5628,06  | 4715,86  | 6614,53  | 5427,86  | 0,44 | 4,315 | 1,60E-05 | 0,004106385 |
| <b>Sema3e</b>        | 6750,14  | 8988,45  | 6271,65  | 8853,82  | 7239,97  | 0,45 | 4,482 | 7,40E-06 | 0,002327729 |
| <b>Gpr182</b>        | 1524,93  | 2349,85  | 1597,97  | 2327,27  | 1871,46  | 0,45 | 3,663 | 0,00025  | 0,03399878  |
| <b>Crim1</b>         | 13036,79 | 15387,03 | 11790,49 | 16943,65 | 13722,92 | 0,46 | 4,059 | 4,93E-05 | 0,010563279 |
| <b>Zc2hc1c</b>       | 154,13   | 208,27   | 144,55   | 209,76   | 169,00   | 0,46 | 3,817 | 0,00014  | 0,022155743 |
| <b>Gm10535</b>       | 5,47     | 15,88    | 4,53     | 28,24    | 13,42    | 0,46 | 3,585 | 0,00034  | 0,042649381 |
| <b>Col4a5</b>        | 10406,69 | 12650,52 | 9663,70  | 13642,31 | 11155,68 | 0,47 | 5,697 | 1,22E-08 | 1,25E-05    |
| <b>Fgfr1</b>         | 5961,99  | 7433,41  | 6333,77  | 9538,79  | 7535,65  | 0,48 | 3,602 | 0,00032  | 0,040866891 |
| <b>Olfml2a</b>       | 241,58   | 372,65   | 273,79   | 432,56   | 333,33   | 0,52 | 3,692 | 0,00022  | 0,031778922 |
| <b>Npnt</b>          | 33626,08 | 41438,04 | 30847,69 | 45640,60 | 36395,03 | 0,52 | 5,443 | 5,24E-08 | 4,25E-05    |
| <b>Ust</b>           | 636,21   | 622,02   | 528,85   | 857,07   | 651,93   | 0,52 | 3,554 | 0,00038  | 0,047271012 |
| <b>Morn4</b>         | 520,33   | 792,00   | 490,44   | 768,31   | 594,64   | 0,52 | 3,902 | 9,53E-05 | 0,017083325 |
| <b>Lsr</b>           | 115,87   | 174,65   | 125,50   | 204,16   | 155,00   | 0,53 | 3,675 | 0,00024  | 0,032813171 |
| <b>Ptprv</b>         | 174,90   | 995,60   | 329,80   | 3395,05  | 1479,27  | 0,53 | 4,25  | 2,14E-05 | 0,005226875 |
| <b>Ifi30</b>         | 560,78   | 697,67   | 555,15   | 887,99   | 679,97   | 0,53 | 3,848 | 0,00012  | 0,01971885  |
| <b>Ap1s3</b>         | 127,90   | 174,65   | 104,92   | 172,32   | 130,20   | 0,54 | 3,723 | 0,0002   | 0,029129745 |
| <b>D030028A08Rik</b> | 118,06   | 194,26   | 130,12   | 208,02   | 159,33   | 0,57 | 4,619 | 3,85E-06 | 0,001413132 |
| <b>Nxpe4</b>         | 28,42    | 74,72    | 32,54    | 144,71   | 74,60    | 0,57 | 3,879 | 0,0001   | 0,018160209 |

|                      |         |          |         |          |          |      |       |          |             |
|----------------------|---------|----------|---------|----------|----------|------|-------|----------|-------------|
| <b>Dok2</b>          | 165,06  | 254,97   | 158,65  | 269,67   | 200,28   | 0,59 | 4,233 | 2,30E-05 | 0,005464135 |
| <b>Ptgfr</b>         | 402,28  | 600,54   | 349,75  | 757,97   | 502,83   | 0,61 | 3,603 | 0,00031  | 0,040866891 |
| <b>AI429214</b>      | 110,41  | 159,71   | 103,21  | 185,98   | 134,25   | 0,61 | 3,984 | 6,76E-05 | 0,013039069 |
| <b>Fbxl16</b>        | 92,92   | 165,31   | 109,79  | 210,05   | 147,38   | 0,61 | 3,786 | 0,00015  | 0,024552568 |
| <b>Csdc2</b>         | 777,22  | 1260,85  | 898,01  | 1667,25  | 1186,47  | 0,61 | 3,88  | 0,0001   | 0,018160209 |
| <b>Slc37a2</b>       | 396,81  | 908,75   | 538,77  | 1138,99  | 763,85   | 0,62 | 3,688 | 0,00023  | 0,031984936 |
| <b>Col26a1</b>       | 189,11  | 279,25   | 192,98  | 355,50   | 253,92   | 0,62 | 4,026 | 5,68E-05 | 0,011845865 |
| <b>Tmem54</b>        | 1452,78 | 2212,56  | 1456,45 | 2512,61  | 1852,51  | 0,62 | 4,52  | 6,17E-06 | 0,001983482 |
| <b>Chrd</b>          | 61,22   | 124,22   | 75,51   | 135,66   | 98,07    | 0,62 | 4,22  | 2,44E-05 | 0,00561414  |
| <b>Ssc5d</b>         | 197,86  | 298,87   | 178,05  | 316,42   | 229,94   | 0,63 | 4,39  | 1,13E-05 | 0,002986058 |
| <b>Tspan2</b>        | 4863,38 | 8911,87  | 4846,48 | 8203,53  | 6105,37  | 0,63 | 5,069 | 3,99E-07 | 0,000227946 |
| <b>Arhgap20</b>      | 18,58   | 58,84    | 37,08   | 152,96   | 80,53    | 0,64 | 4,113 | 3,90E-05 | 0,008597095 |
| <b>Scg5</b>          | 114,78  | 234,42   | 152,80  | 291,06   | 204,65   | 0,64 | 4,072 | 4,67E-05 | 0,010136608 |
| <b>Wnt8b</b>         | 54,66   | 113,01   | 65,37   | 162,61   | 101,84   | 0,64 | 3,804 | 0,00014  | 0,023113838 |
| <b>Rapgef1</b>       | 69,96   | 101,80   | 71,74   | 137,20   | 96,29    | 0,66 | 4,239 | 2,25E-05 | 0,005419073 |
| <b>Anks1b</b>        | 455,84  | 707,94   | 427,94  | 758,55   | 551,92   | 0,66 | 4,917 | 8,80E-07 | 0,000424126 |
| <b>Masp1</b>         | 4,37    | 18,68    | 8,13    | 32,10    | 17,12    | 0,67 | 4,195 | 2,72E-05 | 0,006178088 |
| <b>Ighv9-3</b>       | 10,93   | 45,76    | 6,84    | 34,64    | 17,26    | 0,67 | 4,397 | 1,10E-05 | 0,002986058 |
| <b>6030408B16Rik</b> | 28,42   | 41,09    | 34,70   | 134,16   | 72,00    | 0,69 | 4,301 | 1,70E-05 | 0,004291909 |
| <b>Abat</b>          | 3233,51 | 5591,63  | 3402,18 | 6121,88  | 4422,06  | 0,69 | 5,225 | 1,74E-07 | 0,000112133 |
| <b>Col4a6</b>        | 541,10  | 734,09   | 557,57  | 1113,28  | 765,96   | 0,69 | 4,428 | 9,50E-06 | 0,002665153 |
| <b>Asic2</b>         | 406,65  | 680,86   | 479,42  | 954,43   | 657,55   | 0,70 | 4,533 | 5,83E-06 | 0,001956212 |
| <b>Aplp1</b>         | 6074,58 | 10353,91 | 6042,91 | 12152,61 | 8334,05  | 0,71 | 4,651 | 3,30E-06 | 0,001244254 |
| <b>Polr2a</b>        | 9824,05 | 13399,56 | 9396,92 | 17066,53 | 12273,02 | 0,73 | 6,035 | 1,59E-09 | 2,04E-06    |

|                |        |         |        |         |         |      |       |          |             |
|----------------|--------|---------|--------|---------|---------|------|-------|----------|-------------|
| <b>Il12rb1</b> | 4,37   | 45,76   | 9,26   | 41,31   | 21,28   | 0,74 | 4,651 | 3,31E-06 | 0,001244254 |
| <b>Frem1</b>   | 79,80  | 151,30  | 102,43 | 307,08  | 179,17  | 0,75 | 4,45  | 8,58E-06 | 0,002496342 |
| <b>Cyp1b1</b>  | 818,76 | 1365,45 | 722,26 | 1377,04 | 967,80  | 0,75 | 5,63  | 1,81E-08 | 1,74E-05    |
| <b>Tmod2</b>   | 80,89  | 121,42  | 66,59  | 147,76  | 97,03   | 0,77 | 4,866 | 1,14E-06 | 0,000515706 |
| <b>Zdhhc2</b>  | 142,11 | 359,58  | 191,90 | 474,53  | 297,89  | 0,81 | 4,936 | 7,98E-07 | 0,000396847 |
| <b>Kirrel2</b> | 297,33 | 546,37  | 344,52 | 1046,36 | 607,71  | 0,81 | 4,81  | 1,51E-06 | 0,000647824 |
| <b>Tshb</b>    | 47,01  | 99,00   | 34,97  | 98,31   | 58,72   | 0,87 | 5,264 | 1,41E-07 | 9,45E-05    |
| <b>Dusp14</b>  | 88,54  | 216,68  | 93,76  | 264,94  | 157,95  | 1,07 | 7,031 | 2,04E-12 | 5,25E-09    |
| <b>Fndc5</b>   | 526,89 | 1174,92 | 464,58 | 1484,78 | 847,16  | 1,23 | 8,251 | 1,57E-16 | 6,05E-13    |
| <b>Efemp1</b>  | 703,98 | 1501,81 | 677,09 | 2195,43 | 1246,47 | 1,25 | 8,432 | 3,40E-17 | 1,75E-13    |
